# Supplementary material
Source: Elsevier journal article supplement (https://www.sciencedirect.com/science/article/pii/S030089322400071X)
Supplement: mmc1 [file mmc1.pdf]

## **INVESTIGADORES DEL ESTUDIO REQXAA**

Hospital Clínico San Carlos, Madrid. David Vivas, investigador principal (IP), María Anguita-Gámez, Juan Carlos Gómez-Polo, Julia Playán, Amaya Calbet, Blanca Torres, Andrea Gallardo, Rocío Párraga, Inés Ramos, Manuel Carnero-Alcázar. Hospital Universitari i Politècnic La Fe, Valencia. Raquel Ferrandis (IP), Marysol Echeverri, Jesús Igualada Sevilla, María Salomé Matoses Jaén, María Martí Monferrer, Juan Manuel Sanchís García, Azucena Pajares Moncho, María Isabel Molina Monleón, Jorge Tadeo Puchol Castillo, Virginia Vilar Bianchi, Rosa Bernabeu Santisteban, Rocío Cejudo Armero, María José Alberola Estelles, Elena Díaz Such, Natalia García Claudio. Hospital Clínico Universitario Virgen de la Arrixaca, Murcia. Francisco Marín (IP), María Asunción Esteve-Pastor, José Miguel Rivera-Caravaca, Antonio Tello-Montoliu. Hospital Universitario Infanta Leonor, Vallecas, Madrid. Beatriz Nozal Mateo (co-IP), Ane Abad-Motos (co-IP), Ana Nieto-Moreno, Bárbara Algar-Yáñez, Berenice Gutiérrez-Tonal, Blanca Escontrela, María Laura Pelegrina-López, David Stolle Dueñas, Elena Lucena de Pablo, Elena Nieto-Moreno, Eugenio Martínez-Hurtado, Javier Ripollés-Melchor, Marina de Retes-Sanz, Nerea Gómez-Pérez, Norma Aracil-Escoda, Olga de la Varga-Martínez, Rosa Sanz-González, Sandra Gadín López, Sem Briongos (co-IP), Kateri Chao Novo, Alfredo Abad Gurumeta. Facultad de Odontología, Universidad Complutense, Madrid. Elena Figuero (IP), María González Zamora, Nagore Ambrosio, Ana Molina, David Herrera, Mariano Sanz. Facultad de Odontología, Universidad Rey Juan Carlos, Madrid. Rafael Gómez de Diego, María González-Zamora. Hospital Universitario Reina Sofía, Córdoba. Manuel Anguita (IP), Paula Anguita Gámez, Rafael González Manzanares. Hospital Universitario 12 de octubre, Madrid. Nuria Bouzó (IP), Rosana Sanz-Peñuelas, Álvaro Ramiro-Ruiz, Susana Reca-González, Rocío Gómez Margarida,

Sara Arlanzón de Quevedo, María Guerrero-Díez, Raquel Jiménez-García, Rafael Arboleda-Salazar, Pablo García Pimentel, Agar Cándida Carrero Cabo. Hospital Doctor Balmis, Alicante. Teresa Lozano (IP), Laura Fuertes Kenneally, Ana María García Barrios, Andrea Lloret-Rubio, Carlos López Menchero. Hospital Universitario La Paz, Madrid. Carlos Álvarez (IP). Hospital Universitario Jaén. Javier Torres (IP), María Eugenia Zambrano. Hospital Costa del Sol, Marbella, Málaga. María José Descalzo Pulido (IP), Azahara del Milagro Vázquez, Azahara Sáez-Muñoz, Nansi Vidal Lorenzo. Hospital General Universitario, Valencia. Juan Carlos Catalá (IP), Francisco Ridocci (IP), Marta Jimenez Fenellós. Unidad de Gestión Clínica de Atención Primaria Poniente, Córdoba. Enrique Martín Rioboo (IP), Emilio García Criado, María Ángeles Ortega Osuna, Julia María Hervás Jerez. Centro de Salud Isla de Oza, Madrid. Isabel Egocheaga (IP), Laura Utrilla, Yasmin Drak Hernández. Centro de Salud Palma Norte, Madrid. Francisco Javier Torres-Martínez (IP). Hospital Marina Baixa, Villajoyosa, Alicante. Alejandra Moliner Cantó (IP), Gracia Barber Ballester. Hospital Torrecárdenas, Almería. Rocío Rodríguez Contreras (IP), Regina Bernal-Basurto. Hospital Universitario La Zarzuela, Madrid. Juan José Sánchez Palomo (IP).
